# Supplementary material
Source: PubMed Central journal article supplement (PMC4139480)

# Keratin 15

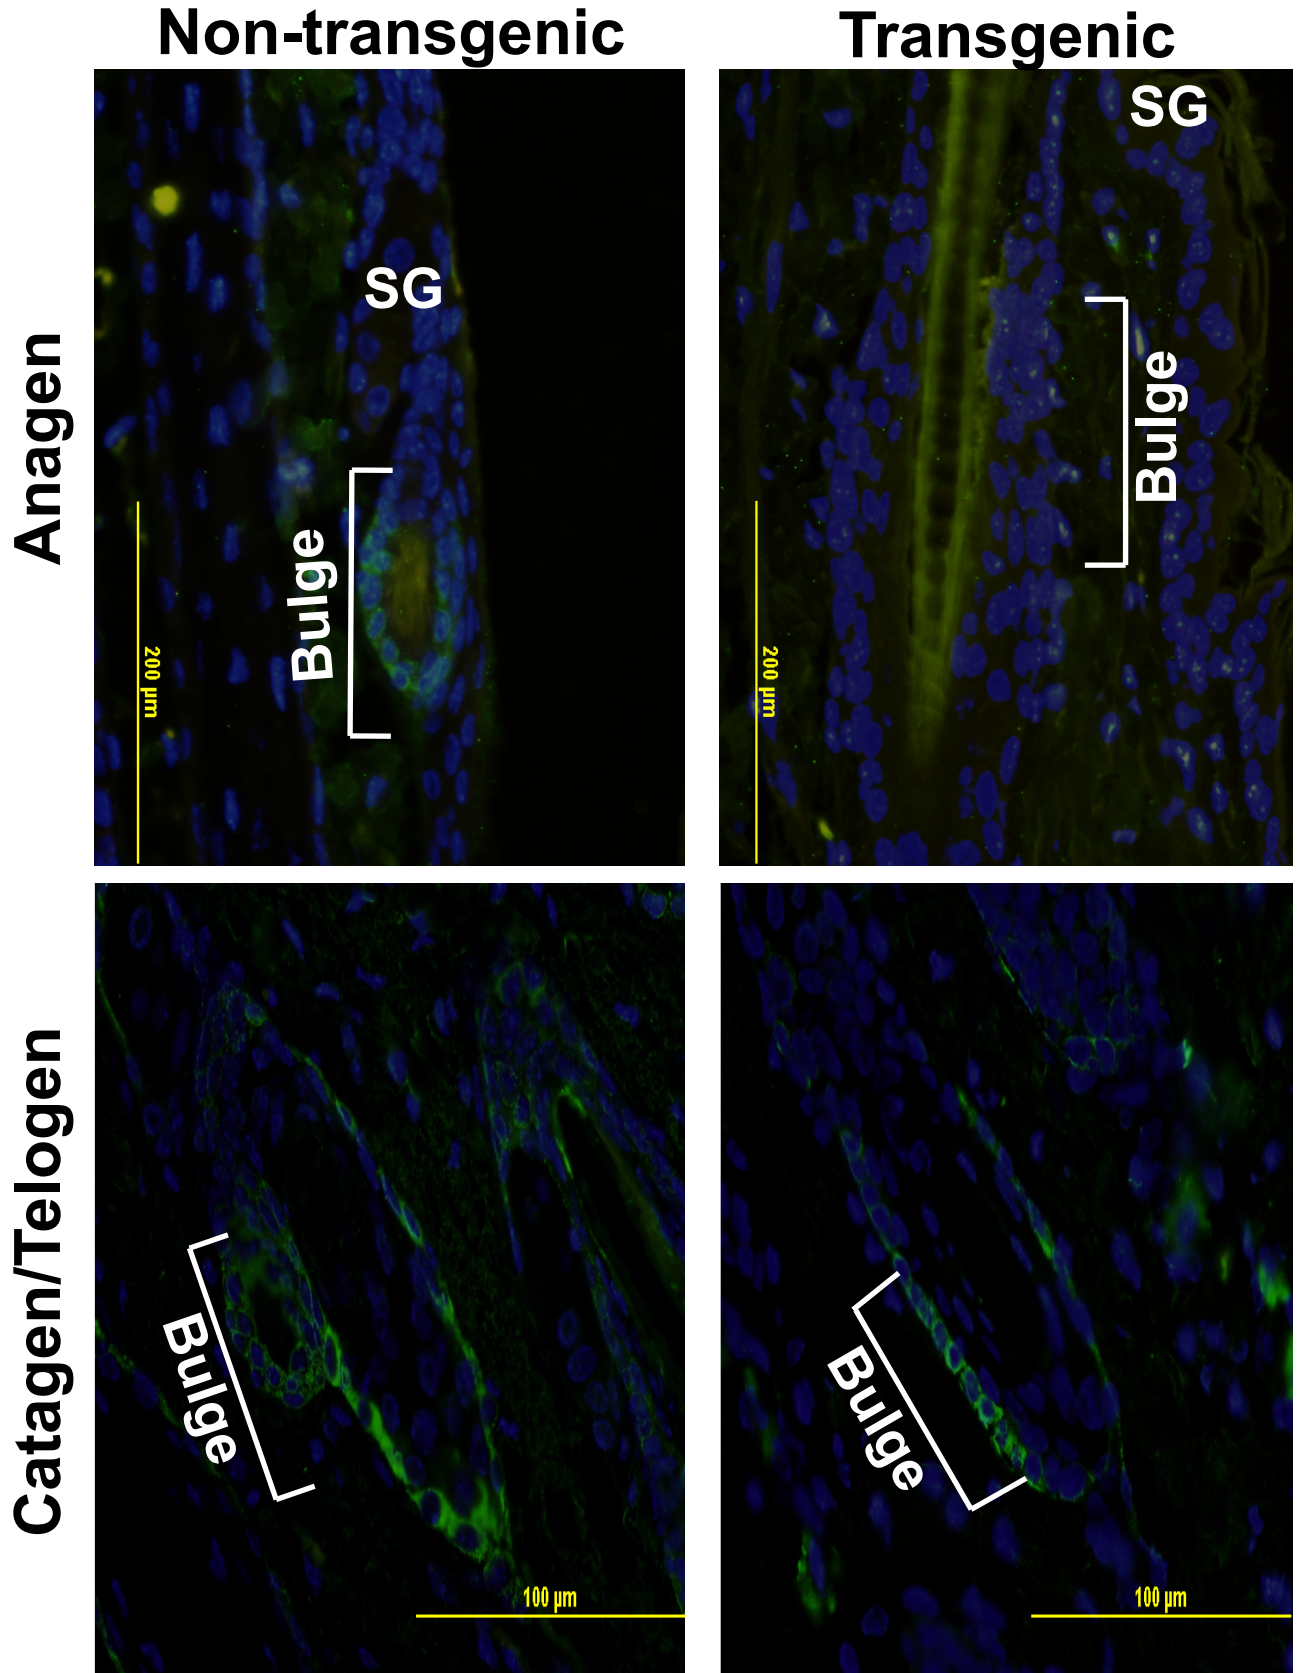

Supplement: NIHMS617459-supplement-Supp_FigureS1.pdf [file NIHMS617459-supplement-Supp_FigureS1.pdf]

**Non-transgenic**

**Transgenic**

**Anagen**

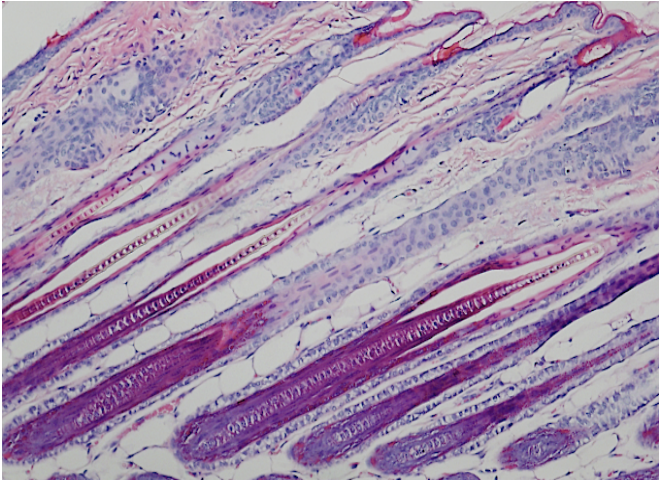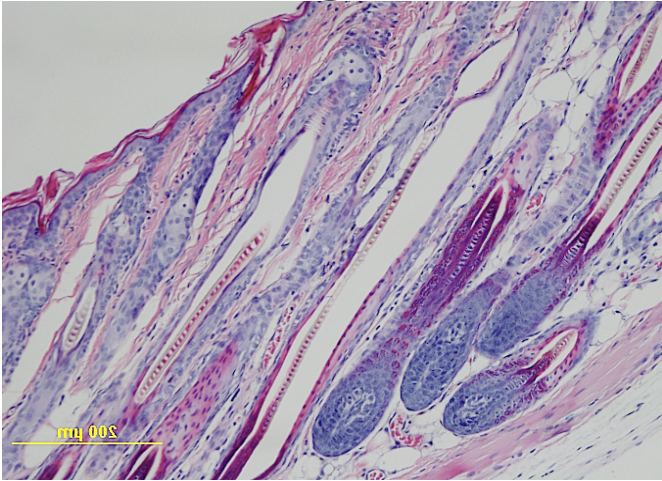

**Catagen**

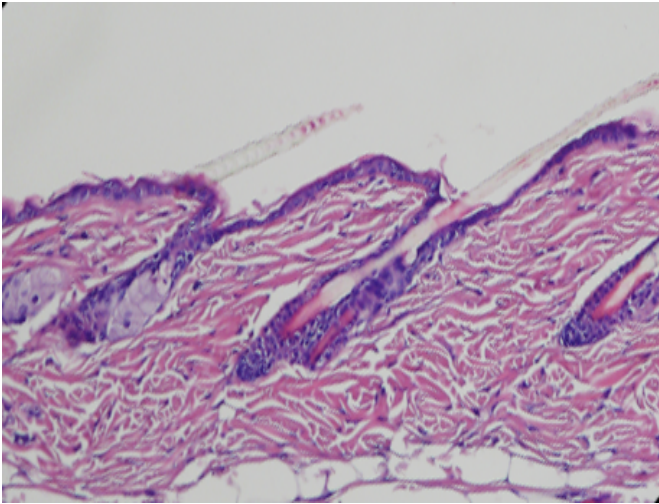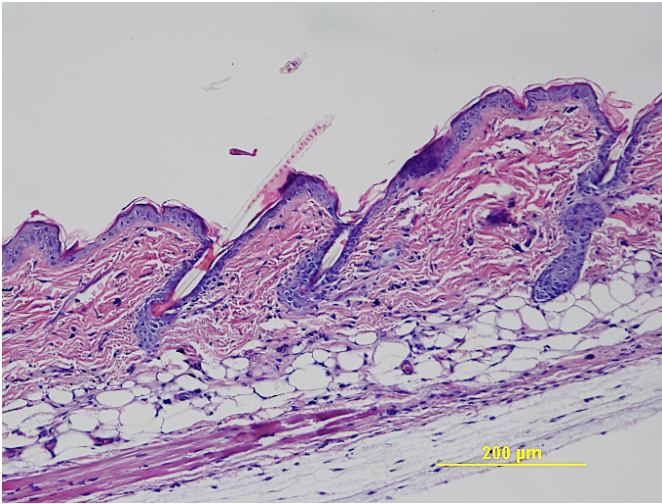

Supplement: NIHMS617459-supplement-Supp_FigureS2.pdf [file NIHMS617459-supplement-Supp_FigureS2.pdf]
